# Supplementary material for: Low-temperature solution-processed p-type vanadium oxide for perovskite solar cells
Source: Royal Society of Chemistry journal article supplement (doi:10.1039/c6cc03740b), 2016-01-01
Supplement: c6cc03740b1.pdf [file c6cc03740b1.pdf]

Supporting Information

for

## **Low-temperature solution-processed p-type vanadium oxide for perovskite solar cells**

Haocheng Sun<sup>a†</sup>, Xiaomeng Hou<sup>a†</sup>, Qiulong Wei<sup>b</sup>, Huawei Liu<sup>a</sup>, Kecheng Yang<sup>a</sup>, Wei  
Wang<sup>c</sup>, Qinyou An<sup>b\*</sup>, Yaoguang Rong<sup>a,c\*</sup>

- a. Wuhan National Laboratory for Optoelectronics, School of Optical and Electronic Information, Huazhong University of Science and Technology, Wuhan 430074, Hubei, P.R.China. E-mail: alexrong2008@gmail.com*
- b. State Key Laboratory of Advanced Technology for Materials Synthesis and Processing, Wuhan University of Technology, Wuhan 430070, Hubei, P.R.China. E-mail: anqinyou86@whut.edu.cn*
- c. School of Physics & Optoelectronic Engineering, Nanjing University of Information Science & Technology, Nanjing 210044, Jiangsu, P.R.China.*

† These authors contributed equally to this work.

## Experiments

**Synthesis of VO<sub>x</sub> sols:** The VO<sub>x</sub> sols were prepared by a melt quenching process. V<sub>2</sub>O<sub>5</sub> powder (20 g) was heated to 800 °C in a ceramic crucible and was kept for 20 min. Then, the molten liquid was quickly poured into 1.0 L distilled water while stirring and a brownish solution was formed immediately. The solution was allowed to heat to the boiling point and then cool down to room temperature. After filtration and aging for more than 3 days, brownish VO<sub>x</sub> sols were obtained. The concentration of the VO<sub>x</sub> sols was calculated by weighting the residual mass after drying the sols in 180 °C for 24 hrs.<sup>22</sup>

**Device fabrication:** The VO<sub>x</sub> sol was spun on cleaned ITO substrates at 4000 rpm for 30 s after UV-ozone treatment for 15 min, and dried at 80~150 °C for 20 min. The perovskite precursor solution was prepared by dissolving 1.25 M CH<sub>3</sub>NH<sub>3</sub>I and PbI<sub>2</sub> mixture (molar ratio 1:1) in a DMF/DMSO mixed solvent at 1:3 volume ratio at 70 °C. The CH<sub>3</sub>NH<sub>3</sub>PbI<sub>3</sub> precursor solution was spun on top of VO<sub>x</sub> layer at 1000 rpm for 10 s and 5000 rpm for 30 s. 400 µl toluene was dripped at the center of the wet film 15 s after the 5000 rpm spinning process started.<sup>23</sup> Then, the films were transferred onto a hotplate and annealed at 100 °C in N<sub>2</sub> (thermal annealing) or DMF vapor (solvent annealing) for 15 min. After cooling down to room temperature (RT), 40 mg ml<sup>-1</sup> dichlorobenzene (DCB) solution of PCBM was spun on top of perovskite films at 1800 rpm for 30 s, and dried at 80 °C for 20 min. Finally, 8 nm-thick bathocuproine (BCP) and 100 nm-thick Al were thermal evaporated with a mask under high vacuum ( $2 \times 10^{-6}$  Pa). The active device area is 0.16 cm<sup>2</sup>.

**Measurement and characterization:** The X-ray diffraction (XRD) spectra were recorded using a Rigaku diffractometer with Cu K $\alpha$  radiation (1.5405 Å). The transmittance spectra and ultraviolet-visible (UV-Vis) absorption spectra were recorded using an Agilent spectrophotometer (Cary 60). X-ray photoelectron spectroscopy (XPS) measurements were performed using a VG MultiLab 2000 instrument. Atomic Force Microscopy (AFM) tests were performed using the Bruker

Innova-IRIS AFM system in tapping mode. The work function of VO<sub>x</sub> layers were measured on ITO coated glass substrates by Kelvin Probe in air. The current-voltage (*I-V*) curves of the VO<sub>x</sub> layer on glass substrates were measured by depositing two parallel silver electrodes and providing a bias between -1.0 and 1.0 V. The current density–voltage (*J-V*) characteristics were measured using a Keithley 2400 source-meter under AM1.5G illumination at 100 mW cm<sup>-2</sup> from a Newport solar simulator calibrated with a Si diode (KG-5 filter). The *J-V* curves were obtained through reverse scan (1.2 V to -0.2 V) and forward scan (-0.2 V to 1.2 V) with a step of 20 mV and a delay time of 50 ms.

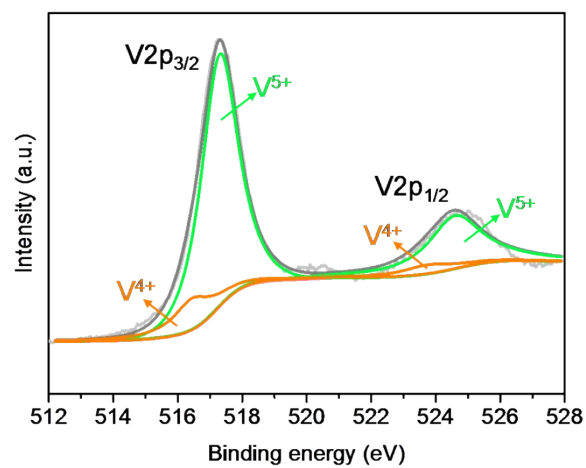

Fig. S1. XPS spectra of the as-prepared VO<sub>x</sub> layer. The calculated V<sup>4+</sup>/V<sup>5+</sup> ratio is 16.8%, corresponding to VO<sub>x</sub> with x = 2.428.

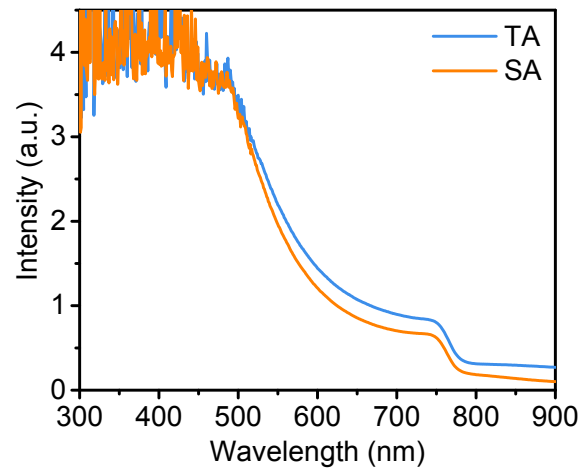

Fig. S2. Absorption spectra of CH<sub>3</sub>NH<sub>3</sub>PbI<sub>3</sub> layers (*ca.* 300 nm) processed with thermal annealing (TA) and solvent annealing (SA) process.
